# Supplementary material for: Does sex hormone-binding globulin cause insulin resistance during pubertal growth?
Source: PubMed Central journal article supplement (PMC6499923; doi:10.1530/ec-19-0044), 2019-03-29
Supplement: supplementary_figure_1.pdf [file supplementary_figure_1.pdf]

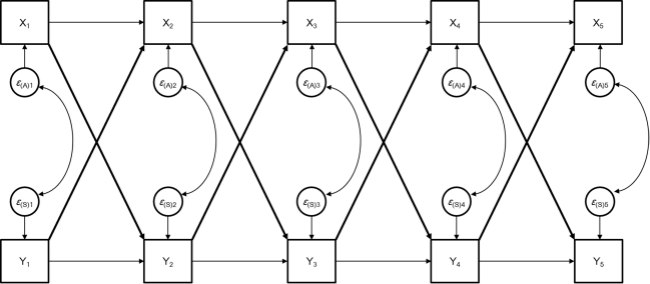

Baseline

1-year follow-up

2-year follow-up

4-year follow-up

7.5-year follow-up
